# Supplementary material
Source: publisher site journal article supplement (https://www.spandidos-publications.com/2615/downloadSupplementary)
Supplement: Supplementary file 1 [file downloadSupplementary]

## Sheet: Table SXIII
Table SXIII. Interaction of miR150 and its target gemes on patients' overall survival and disease-free survival.
Variable	Overall survival				Disease-free survival
	Na	Median (Q1-Q3)b	HR (95% CI)	P-valuec	Na	Median (Q1-Q3)b	HR (95% CI)	P-valuec
Interaction of miR150 and ADIPOR2
miR150 < 9.55 and ADIPOR2 < 11.30	338	24.85 (13.71-52.86)	Reference		309	22.24 (13.01-43.00)	Reference
miR150 < 9.55 and ADIPOR2 ≥ 11.30	380	23.77 (13.63-47.70)	0.95 (0.39-2.32)	0.906	342	21.30 (13.01-40.33)	1.26 (0.48-3.31)	0.644
miR150 ≥ 9.55 and ADIPOR2 < 11.30	200	38.09 (19.12-72.77)	0.27 (0.08-0.90)	0.034	186	34.91 (17.53-68.28)	0.44 (0.13-1.49)	0.189
miR150 ≥ 9.55 and ADIPOR2 ≥ 11.30	155	33.67 (16.87-69.52)	0.11 (0.01-0.91)	0.041	147	32.03 (15.67-66.41)	0.29 (0.06-1.51)	0.141
Interaction of miR150 and AHI1
miR150 < 9.55 and AHI1 < 8.48	345	24.70 (13.04-51.28)	Reference		315	21.68 (12.77-44.31)	Reference
miR150 < 9.55 and AHI1 ≥ 8.48	373	23.85 (14.36-48.42)	1.84 (0.76-4.47)	0.176	336	22.27 (13.64-39.81)	1.53 (0.60-3.92)	0.374
miR150 ≥ 9.55 and AHI1 < 8.48	191	37.19 (18.16-72.44)	0.44 (0.11-1.69)	0.23	179	33.31 (17.19-65.56)	0.51 (0.14-1.85)	0.309
miR150 ≥ 9.55 and AHI1 ≥ 8.48	164	35.92 (18.62-70.87)	0.01 (0.00-0.50)	0.02	154	34.12 (16.71-70.44)	0.60 (0.13-2.80)	0.512
Interaction of miR150 and AMOTL2
miR150 < 9.55 and AMOTL2 < 10.42	355	22.08 (12.77-43.28)	Reference		324	20.37 (12.32-37.53)	Reference
miR150 < 9.55 and AMOTL2 ≥ 10.42	363	27.00 (14.73-52.80)	1.44 (0.60-3.45)	0.409	327	23.23 (13.99-46.88)	1.06 (0.42-2.69)	0.899
miR150 ≥ 9.55 and AMOTL2 < 10.42	181	33.67 (17.12-68.69)	0.09 (0.01-0.62)	0.014	171	32.03 (14.75-63.41)	0.46 (0.11-1.95)	0.293
miR150 ≥ 9.55 and AMOTL2 ≥ 10.42	174	38.39 (19.19-74.08)	0.16 (0.04-0.64)	0.009	162	34.91 (17.79-71.70)	0.40 (0.12-1.29)	0.124
Interaction of miR150 and BTLA
miR150 < 9.55 and BTLA < 3.68	504	24.54 (13.72-50.49)	Reference		455	22.44 (13.02-42.91)	Reference
miR150 < 9.55 and BTLA ≥ 3.68	214	22.32 (13.56-50.02)	0.85 (0.34-2.12)	0.721	196	21.12 (12.62-42.15)	0.44 (0.15-1.29)	0.135
miR150 ≥ 9.55 and BTLA < 3.68	32	36.25 (18.25-47.01)	1.02 (0.16-6.31)	0.986	31	36.27 (18.05-45.80)	1.08 (0.20-5.88)	0.931
miR150 ≥ 9.55 and BTLA ≥ 3.68	323	36.10 (18.35-73.06)	0.07 (0.02-0.29)	< 0.001	302	33.09 (17.13-70.54)	0.26 (0.09-0.71)	0.008
Interaction of miR150 and EGR2
miR150 < 9.55 and EGR2 < 8.17	413	23.59 (12.94-43.00)	Reference		374	21.55 (12.58-38.62)	Reference
miR150 < 9.55 and EGR2 ≥ 8.17	305	25.72 (14.42-55.58)	0.78 (0.33-1.84)	0.57	277	22.44 (13.60-47.57)	0.40 (0.15-1.07)	0.069
miR150 ≥ 9.55 and EGR2 < 8.17	123	32.03 (18.73-52.94)	0.22 (0.05-0.92)	0.038	115	30.32 (18.16-51.89)	0.33 (0.09-1.23)	0.099
miR150 ≥ 9.55 and EGR2 ≥ 8.17	232	38.03 (18.18-74.87)	0.05 (0.01-0.24)	< 0.001	218	35.83 (16.70-74.65)	0.29 (0.10-0.84)	0.023
Interaction of miR150 and ELK1
miR150 < 9.55 and ELK1 < 9.69	369	23.92 (14.98-44.84)	Reference		331	21.45 (13.39-38.50)	Reference
miR150 < 9.55 and ELK1 ≥ 9.69	349	23.88 (12.94-53.94)	0.85 (0.35-2.07)	0.724	320	22.37 (12.93-45.67)	0.98 (0.40-2.40)	0.971
miR150 ≥ 9.55 and ELK1 < 9.69	169	35.74 (17.67-68.69)	0.45 (0.11-1.79)	0.254	160	33.86 (16.46-68.96)	0.57 (0.15-2.19)	0.414
miR150 ≥ 9.55 and ELK1 ≥ 9.69	186	38.20 (18.96-72.02)	0.19 (0.05-0.70)	0.013	173	33.31 (17.48-66.33)	0.62 (0.20-1.87)	0.395
Interaction of miR150 and EREG
miR150 < 9.55 and EREG < 2.24	396	23.67 (13.03-47.04)	Reference		353	21.39 (12.98-40.21)	Reference
miR150 < 9.55 and EREG ≥ 2.24	322	25.54 (14.53-52.35)	1.66 (0.71-3.88)	0.238	298	22.62 (13.28-44.01)	1.56 (0.59-4.11)	0.366
miR150 ≥ 9.55 and EREG < 2.24	140	38.45 (18.02-63.36)	0.29 (0.03-3.22)	0.311	131	32.49 (17.33-61.01)	1.51 (0.40-5.73)	0.545
miR150 ≥ 9.55 and EREG ≥ 2.24	215	35.91 (18.58-73.06)	0.75 (0.22-2.55)	0.644	202	33.69 (16.70-70.94)	0.46 (0.12-1.80)	0.267
Interaction of miR150 and EZH2
miR150 < 9.55 and EZH2 < 8.51	401	25.03 (13.47-51.54)	Reference		360	23.21 (13.01-44.45)	Reference
miR150 < 9.55 and EZH2 ≥ 8.51	317	22.31 (13.96-46.98)	0.56 (0.22-1.48)	0.245	291	21.02 (13.14-37.75)	1.28 (0.45-3.64)	0.638
miR150 ≥ 9.55 and EZH2 < 8.51	135	39.75 (20.94-71.47)	0.09 (0.01-0.86)	0.037	130	38.28 (20.90-69.10)	0.55 (0.16-1.90)	0.341
miR150 ≥ 9.55 and EZH2 ≥ 8.51	220	33.39 (14.62-69.64)	0.22 (0.06-0.79)	0.02	203	30.16 (14.16-66.73)	0.37 (0.11-1.28)	0.115
Interaction of miR150 and GOSR1
miR150 < 9.55 and GOSR1 < 10.28	330	23.90 (14.49-53.70)	Reference		307	21.91 (13.12-44.25)	Reference
miR150 < 9.55 and GOSR1 ≥ 10.28	388	24.21 (13.43-47.70)	1.12 (0.47-2.68)	0.797	344	21.98 (13.01-40.25)	0.34 (0.13-0.93)	0.035
miR150 ≥ 9.55 and GOSR1 < 10.28	207	31.93 (17.90-66.69)	0.36 (0.11-1.14)	0.082	195	30.16 (16.84-64.95)	0.36 (0.12-1.06)	0.063
miR150 ≥ 9.55 and GOSR1 ≥ 10.28	148	40.98 (19.11-74.08)	0.00 (0.00-Inf)	0.999	138	38.70 (17.20-70.95)	0.31 (0.08-1.14)	0.077
Interaction of miR150 and KLHL21
miR150 < 9.55 and KLHL21 < 9.96	372	24.90 (15.29-48.62)	Reference		336	22.12 (14.14-41.75)	Reference
miR150 < 9.55 and KLHL21 ≥ 9.96	346	23.77 (12.72-50.80)	0.85 (0.34-2.12)	0.73	315	21.71 (12.43-43.55)	0.63 (0.25-1.60)	0.327
miR150 ≥ 9.55 and KLHL21 < 9.96	165	33.90 (14.91-60.32)	0.18 (0.03-1.02)	0.052	153	33.67 (14.82-56.14)	0.26 (0.06-1.06)	0.06
miR150 ≥ 9.55 and KLHL21 ≥ 9.96	190	39.44 (19.42-78.79)	0.16 (0.04-0.63)	0.009	180	33.92 (19.12-75.50)	0.32 (0.09-1.12)	0.075
Interaction of miR150 and LRRC1
miR150 < 9.55 and LRRC1 < 9.67	344	23.23 (13.06-44.70)	Reference		315	21.81 (12.96-41.11)	Reference
miR150 < 9.55 and LRRC1 ≥ 9.67	374	24.54 (14.08-52.99)	2.39 (0.97-5.91)	0.059	336	22.12 (13.57-43.20)	1.49 (0.58-3.81)	0.406
miR150 ≥ 9.55 and LRRC1 < 9.67	192	32.67 (18.87-74.30)	0.71 (0.19-2.60)	0.604	182	32.18 (17.31-73.57)	0.49 (0.12-1.96)	0.311
miR150 ≥ 9.55 and LRRC1 ≥ 9.67	163	38.57 (17.90-67.02)	0.09 (0.01-0.94)	0.044	151	36.89 (16.56-61.23)	0.56 (0.15-2.09)	0.392
Interaction of miR150 and LTBP2
miR150 < 9.55 and LTBP2 < 11.80	376	25.05 (13.52-49.27)	Reference		340	23.84 (13.45-43.03)	Reference
miR150 < 9.55 and LTBP2 ≥ 11.80	342	22.62 (13.78-50.85)	2.50 (0.90-6.94)	0.08	311	20.99 (13.00-40.44)	3.14 (1.07-9.20)	0.037
miR150 ≥ 9.55 and LTBP2 < 11.80	160	34.91 (18.18-61.48)	0.32 (0.07-1.49)	0.148	147	31.90 (14.83-55.83)	0.65 (0.15-2.76)	0.559
miR150 ≥ 9.55 and LTBP2 ≥ 11.80	195	37.19 (18.58-74.75)	0.61 (0.12-2.97)	0.539	186	35.48 (17.33-74.65)	1.61 (0.39-6.68)	0.509
Interaction of miR150 and MBD6
miR150 < 9.55 and MBD6 < 10.47	334	23.05 (13.15-50.90)	Reference		305	21.81 (13.01-44.12)	Reference
miR150 < 9.55 and MBD6 ≥ 10.47	384	24.98 (14.04-48.81)	0.99 (0.43-2.29)	0.976	346	22.16 (13.11-39.73)	1.95 (0.75-5.08)	0.172
miR150 ≥ 9.55 and MBD6 < 10.47	203	35.91 (19.19-73.06)	0.15 (0.03-0.64)	0.011	188	32.75 (17.42-70.85)	0.29 (0.08-1.12)	0.073
miR150 ≥ 9.55 and MBD6 ≥ 10.47	152	36.14 (17.57-66.51)	0.12 (0.02-0.69)	0.018	145	35.91 (16.16-66.33)	0.48 (0.09-2.45)	0.38
Interaction of miR150 and MTMR9
miR150 < 9.55 and MTMR9 < 8.52	341	23.59 (13.40-51.54)	Reference		312	22.08 (12.82-44.48)	Reference
miR150 < 9.55 and MTMR9 ≥ 8.52	377	24.77 (13.93-48.00)	1.43 (0.59-3.51)	0.429	339	21.75 (13.23-40.36)	0.83 (0.32-2.17)	0.704
miR150 ≥ 9.55 and MTMR9 < 8.52	196	35.41 (17.22-65.17)	0.55 (0.15-1.97)	0.357	186	32.69 (14.93-60.72)	0.31 (0.09-1.10)	0.07
miR150 ≥ 9.55 and MTMR9 ≥ 8.52	159	38.34 (19.20-74.38)	0.08 (0.01-0.94)	0.044	147	35.74 (19.04-74.08)	0.78 (0.27-2.25)	0.644
Interaction of miR150 and MUC4
miR150 < 9.55 and MUC4 < 2.79	371	23.92 (13.70-51.35)	Reference		333	21.91 (13.01-44.25)	Reference
miR150 < 9.55 and MUC4 ≥ 2.79	347	23.88 (13.60-46.30)	0.84 (0.34-2.04)	0.695	318	22.03 (13.01-40.18)	0.82 (0.31-2.17)	0.694
miR150 ≥ 9.55 and MUC4 < 2.79	166	36.14 (18.27-61.74)	0.31 (0.07-1.39)	0.127	154	35.07 (15.64-61.74)	0.25 (0.06-1.12)	0.07
miR150 ≥ 9.55 and MUC4 ≥ 2.79	189	35.74 (18.66-74.08)	0.18 (0.05-0.68)	0.012	179	32.42 (17.21-69.52)	0.45 (0.14-1.49)	0.191
Interaction of miR150 and MYB
miR150 < 9.55 and MYB < 10.61	320	24.32 (13.47-50.21)	Reference		292	21.55 (12.53-44.88)	Reference
miR150 < 9.55 and MYB ≥ 10.61	398	23.90 (13.86-49.95)	1.22 (0.47-3.14)	0.683	359	22.31 (13.25-40.38)	1.20 (0.43-3.38)	0.732
miR150 ≥ 9.55 and MYB < 10.61	216	32.18 (17.16-71.11)	0.27 (0.07-1.00)	0.051	201	29.80 (14.98-68.69)	0.21 (0.06-0.80)	0.022
miR150 ≥ 9.55 and MYB ≥ 10.61	139	40.70 (20.71-70.91)	0.50 (0.10-2.52)	0.405	132	40.26 (20.06-67.99)	0.96 (0.31-3.01)	0.946
Interaction of miR150 and NOTCH3
miR150 < 9.55 and NOTCH3 < 11.97	344	26.00 (15.75-52.75)	Reference		305	23.09 (14.68-44.12)	Reference
miR150 < 9.55 and NOTCH3 ≥ 11.97	374	22.31 (12.94-46.17)	0.97 (0.37-2.53)	0.95	346	21.14 (12.53-39.40)	1.12 (0.43-2.90)	0.812
miR150 ≥ 9.55 and NOTCH3 < 11.97	192	36.00 (18.43-74.75)	0.08 (0.02-0.39)	0.002	180	34.71 (16.80-70.03)	0.12 (0.02-0.60)	0.01
miR150 ≥ 9.55 and NOTCH3 ≥ 11.97	163	36.17 (18.07-66.69)	0.43 (0.09-2.00)	0.279	153	32.88 (17.12-66.33)	1.45 (0.42-5.04)	0.558
Interaction of miR150 and PDCD4
miR150 < 9.55 and PDCD4 < 12.31	353	21.81 (12.94-46.55)	Reference		318	19.94 (12.17-40.20)	Reference
miR150 < 9.55 and PDCD4 ≥ 12.31	365	26.38 (15.44-52.69)	1.55 (0.57-4.18)	0.388	333	24.93 (14.68-43.40)	0.53 (0.20-1.42)	0.207
miR150 ≥ 9.55 and PDCD4 < 12.31	183	34.53 (17.16-65.91)	0.53 (0.14-1.98)	0.343	172	32.69 (15.25-63.32)	0.44 (0.12-1.58)	0.211
miR150 ≥ 9.55 and PDCD4 ≥ 12.31	172	37.75 (19.61-74.08)	0.40 (0.09-1.82)	0.238	161	36.10 (18.13-71.94)	0.33 (0.10-1.08)	0.067
Interaction of miR150 and PDIA6
miR150 < 9.55 and PDIA6 < 12.40	395	25.79 (14.96-51.31)	Reference		357	23.23 (13.73-44.38)	Reference
miR150 < 9.55 and PDIA6 ≥ 12.40	323	21.68 (12.79-44.58)	1.27 (0.47-3.43)	0.643	294	20.09 (12.58-37.71)	0.41 (0.12-1.40)	0.153
miR150 ≥ 9.55 and PDIA6 < 12.40	141	39.36 (19.55-71.94)	0.24 (0.04-1.34)	0.105	130	38.67 (19.57-70.95)	0.53 (0.16-1.79)	0.305
miR150 ≥ 9.55 and PDIA6 ≥ 12.40	214	34.22 (17.19-64.48)	0.12 (0.03-0.54)	0.006	203	31.93 (14.43-62.36)	0.28 (0.08-0.94)	0.039
Interaction of miR150 and PLXDC1
miR150 < 9.55 and PLXDC1 < 9.04	351	26.68 (13.35-53.91)	Reference		311	22.37 (12.91-44.73)	Reference
miR150 < 9.55 and PLXDC1 ≥ 9.04	367	22.93 (14.03-44.52)	1.49 (0.56-3.98)	0.426	340	21.66 (13.18-39.12)	1.03 (0.40-2.69)	0.949
miR150 ≥ 9.55 and PLXDC1 < 9.04	185	37.52 (17.67-68.69)	0.11 (0.02-0.60)	0.01	173	31.90 (14.98-62.88)	0.37 (0.11-1.27)	0.114
miR150 ≥ 9.55 and PLXDC1 ≥ 9.04	170	35.91 (19.20-74.08)	0.89 (0.26-3.05)	0.858	160	34.46 (18.31-72.47)	0.88 (0.25-3.04)	0.841
Interaction of miR150 and QSOX1
miR150 < 9.55 and QSOX1 < 11.84	314	26.56 (13.56-52.53)	Reference		283	21.39 (12.32-44.58)	Reference
miR150 < 9.55 and QSOX1 ≥ 11.84	404	23.14 (13.72-45.52)	0.77 (0.33-1.77)	0.537	368	22.27 (13.72-40.11)	0.91 (0.38-2.21)	0.84
miR150 ≥ 9.55 and QSOX1 < 11.84	222	38.57 (18.96-77.55)	0.10 (0.02-0.54)	0.008	205	35.91 (18.20-77.89)	0.27 (0.07-0.97)	0.044
miR150 ≥ 9.55 and QSOX1 ≥ 11.84	133	32.42 (17.25-55.58)	0.61 (0.20-1.92)	0.401	128	30.39 (15.63-50.23)	1.22 (0.43-3.43)	0.706
Interaction of miR150 and RFK
miR150 < 9.55 and RFK < 9.01	353	23.03 (13.50-46.55)	Reference		321	21.29 (13.01-37.71)	Reference
miR150 < 9.55 and RFK ≥ 9.01	365	25.07 (13.99-51.54)	0.45 (0.19-1.11)	0.083	330	22.68 (13.11-44.68)	0.56 (0.22-1.44)	0.229
miR150 ≥ 9.55 and RFK < 9.01	184	37.91 (19.46-71.97)	0.33 (0.09-1.17)	0.085	171	32.72 (19.26-70.81)	0.64 (0.20-2.07)	0.461
miR150 ≥ 9.55 and RFK ≥ 9.01	171	35.74 (17.25-68.15)	0.19 (0.05-0.71)	0.014	162	34.12 (14.42-64.48)	0.42 (0.14-1.31)	0.136
Interaction of miR150 and RNF165
miR150 < 9.55 and RNF165 < 5.36	369	22.93 (12.94-43.00)	Reference		338	20.37 (12.49-38.13)	Reference
miR150 < 9.55 and RNF165 ≥ 5.36	349	26.22 (14.65-53.94)	0.46 (0.19-1.15)	0.098	313	23.49 (13.96-45.04)	0.37 (0.14-1.01)	0.052
miR150 ≥ 9.55 and RNF165 < 5.36	168	26.20 (15.17-53.11)	0.11 (0.02-0.56)	0.007	160	25.71 (14.25-52.88)	0.40 (0.12-1.35)	0.14
miR150 ≥ 9.55 and RNF165 ≥ 5.36	187	42.31 (20.94-79.37)	0.19 (0.06-0.64)	0.007	173	40.47 (19.71-78.35)	0.35 (0.12-1.02)	0.054
Interaction of miR150 and SGTB
miR150 < 9.55 and SGTB < 7.45	410	24.57 (12.94-51.33)	Reference		371	22.24 (12.54-43.27)	Reference
miR150 < 9.55 and SGTB ≥ 7.45	308	23.83 (14.78-45.84)	0.92 (0.39-2.14)	0.845	280	21.55 (13.95-40.80)	1.48 (0.60-3.63)	0.39
miR150 ≥ 9.55 and SGTB < 7.45	126	38.09 (20.04-54.94)	0.68 (0.23-2.01)	0.49	121	36.27 (19.71-53.19)	0.51 (0.13-1.93)	0.32
miR150 ≥ 9.55 and SGTB ≥ 7.45	229	35.91 (17.21-77.92)	0.10 (0.02-0.55)	0.008	212	32.69 (15.47-75.02)	0.64 (0.19-2.21)	0.483
Interaction of miR150 and SLC7A11
miR150 < 9.55 and SLC7A11 < 6.50	375	25.03 (14.68-51.10)	Reference		339	22.34 (13.68-44.31)	Reference
miR150 < 9.55 and SLC7A11 ≥ 6.50	343	23.78 (13.15-45.32)	0.86 (0.35-2.09)	0.735	312	21.12 (12.51-38.05)	1.22 (0.48-3.08)	0.679
miR150 ≥ 9.55 and SLC7A11 < 6.50	162	39.21 (18.69-71.66)	0.20 (0.04-1.01)	0.051	154	37.58 (17.53-69.51)	0.18 (0.03-0.97)	0.047
miR150 ≥ 9.55 and SLC7A11 ≥ 6.50	193	33.90 (18.20-69.25)	0.25 (0.07-0.90)	0.033	179	31.90 (15.59-63.23)	0.85 (0.27-2.72)	0.791
Interaction of miR150 and SP1
miR150 < 9.55 and SP1 < 11.69	332	22.34 (12.65-42.97)	Reference		309	21.71 (12.32-38.93)	Reference
miR150 < 9.55 and SP1 ≥ 11.69	386	25.77 (15.16-52.40)	1.43 (0.54-3.81)	0.472	342	22.32 (13.95-44.38)	1.13 (0.44-2.93)	0.795
miR150 ≥ 9.55 and SP1 < 11.69	203	32.33 (17.58-61.65)	0.45 (0.12-1.64)	0.228	192	28.66 (14.96-61.03)	0.52 (0.15-1.79)	0.298
miR150 ≥ 9.55 and SP1 ≥ 11.69	152	40.50 (19.21-78.00)	0.00 (0.00-Inf)	0.999	141	38.21 (19.19-74.08)	0.30 (0.07-1.20)	0.089
Interaction of miR150 and TRPS1
miR150 < 9.55 and TRPS1 < 12.96	326	23.36 (13.56-44.21)	Reference		307	21.91 (13.34-40.09)	Reference
miR150 < 9.55 and TRPS1 ≥ 12.96	392	24.57 (13.92-53.96)	1.10 (0.44-2.76)	0.839	344	22.02 (13.01-44.28)	0.94 (0.34-2.59)	0.903
miR150 ≥ 9.55 and TRPS1 < 12.96	211	32.85 (17.20-69.52)	0.09 (0.02-0.48)	0.004	201	32.42 (14.91-67.05)	0.41 (0.12-1.43)	0.162
miR150 ≥ 9.55 and TRPS1 ≥ 12.96	144	39.17 (19.24-72.70)	0.28 (0.07-1.12)	0.072	132	36.04 (18.87-69.27)	0.58 (0.17-2.00)	0.391
Interaction of miR150 and XPNPEP3
miR150 < 9.55 and XPNPEP3 < 7.83	351	24.93 (14.49-50.55)	Reference		325	22.93 (13.99-40.54)	Reference
miR150 < 9.55 and XPNPEP3 ≥ 7.83	367	23.46 (12.94-48.72)	1.15 (0.46-2.86)	0.77	326	20.65 (12.38-42.99)	0.85 (0.34-2.12)	0.733
miR150 ≥ 9.55 and XPNPEP3 < 7.83	186	35.83 (19.93-70.54)	0.38 (0.09-1.50)	0.166	180	34.71 (19.52-66.92)	0.55 (0.19-1.61)	0.276
miR150 ≥ 9.55 and XPNPEP3 ≥ 7.83	169	37.52 (14.91-70.99)	0.33 (0.08-1.31)	0.113	153	31.90 (14.42-69.25)	0.52 (0.16-1.71)	0.282
Interaction of miR150 and ZEB1
miR150 < 9.55 and ZEB1 < 9.43	372	24.34 (12.94-49.27)	Reference		333	21.91 (12.55-40.21)	Reference
miR150 < 9.55 and ZEB1 ≥ 9.43	346	23.88 (14.08-52.42)	3.68 (1.33-10.18)	0.012	318	21.91 (13.25-43.33)	1.25 (0.48-3.21)	0.649
miR150 ≥ 9.55 and ZEB1 < 9.43	164	36.81 (18.74-68.83)	0.52 (0.14-1.96)	0.336	155	31.90 (14.83-62.53)	0.63 (0.19-2.14)	0.463
miR150 ≥ 9.55 and ZEB1 ≥ 9.43	191	35.91 (17.67-74.08)	0.44 (0.07-2.91)	0.394	178	35.07 (17.20-71.70)	0.54 (0.14-1.99)	0.351
Interaction of miR150 and ZNF347
miR150 < 9.55 and ZNF347 < 7.45	350	23.23 (12.94-52.40)	Reference		328	22.08 (12.62-44.87)	Reference
miR150 < 9.55 and ZNF347 ≥ 7.45	368	25.00 (14.40-48.44)	0.71 (0.31-1.65)	0.431	323	21.81 (13.37-40.09)	0.49 (0.19-1.25)	0.136
miR150 ≥ 9.55 and ZNF347 < 7.45	186	33.80 (18.15-70.54)	0.46 (0.16-1.34)	0.154	176	32.18 (15.25-66.51)	0.43 (0.15-1.25)	0.121
miR150 ≥ 9.55 and ZNF347 ≥ 7.45	169	38.57 (18.89-71.94)	0.00 (0.00-Inf)	0.997	157	36.89 (18.79-71.94)	0.21 (0.04-0.96)	0.045
Interaction of miR150 and ZNF460
miR150 < 9.55 and ZNF460 < 5.56	373	23.92 (14.13-46.55)	Reference		342	22.27 (13.56-39.68)	Reference
miR150 < 9.55 and ZNF460 ≥ 5.56	345	23.88 (13.07-51.28)	0.46 (0.19-1.13)	0.092	309	21.12 (12.94-43.56)	0.52 (0.20-1.35)	0.18
miR150 ≥ 9.55 and ZNF460 < 5.56	164	33.95 (17.62-61.61)	0.42 (0.13-1.33)	0.14	157	32.72 (15.34-59.13)	0.48 (0.17-1.36)	0.165
miR150 ≥ 9.55 and ZNF460 ≥ 5.56	191	38.57 (19.04-79.63)	0.05 (0.01-0.42)	0.006	176	35.14 (18.02-77.97)	0.27 (0.08-0.91)	0.035
a Number of samples, some of these variables have missing values.
b Data were shown as median (Q1-Q3 quantiles) overall or disease-free survival months.
c P-values were adjusted for diagnosis age, ER status, PR status, HER2 status, copy number alterations, lymph nodes examined number, mutation count and stage.
